# Supplementary material for: The Role of Surgery in Pleural Mesothelioma
Source: MDPI journal article supplement (doi:10.3390/cancers16091719), 2024-04-28
Supplement: s1 [file s1]

**Supplementary Table S1. Comparison between EPP and ePD.**

|                                         | ePD |   | EPP |
|-----------------------------------------|-----|---|-----|
| Rate of tumor removal                   |     | < |     |
| Perioperative morbidity rate            |     | < |     |
| Perioperative mortality rate            |     | < |     |
| Compliance with multimodality treatment |     | > |     |
| Quality of life                         |     | > |     |
| Long term survival                      |     | ≈ |     |
| Locoregional recurrence rate            |     | > |     |

EPP-Extra pleural pneumonectomy, ePD-Extended Pleurectomy decortication.
